# Supplementary material for: Vitamin D stimulates miR-26b-5p to inhibit placental COX-2 expression in preeclampsia
Source: PubMed Central journal article supplement (PMC8160000; doi:10.1038/s41598-021-90605-9), 2021-05-27

**Vitamin D stimulates miR-26b-5p to inhibit placental COX-2 expression in preeclampsia**

Yang Cao<sup>1</sup>, Xiaotong Jia<sup>1</sup>, Yujia Huang<sup>1</sup>, Jiao Wang<sup>1</sup>, Chunmei Lu<sup>1</sup>, Xiaolei Yuan<sup>3</sup>,  
Jie Xu<sup>1\*</sup>, Hui Zhu<sup>1,2\*</sup>

1 Department of Physiology, Harbin Medical University, Harbin, 150081, China

2 Laboratory of Medical Genetics, Harbin Medical University, and The Key Laboratory of Preservation of Human Genetic Resources and Disease Control in China, Chinese Ministry of Education, Harbin 150081, China

3 Department of Obstetrics & Gynecology, Second Affiliated Hospital of Harbin Medical University. Harbin, 150081, China

\* Correspondence: zhuhui@ems.hrbmu.edu.cn; xujie@ems.hrbmu.edu.cn

Figure 1B

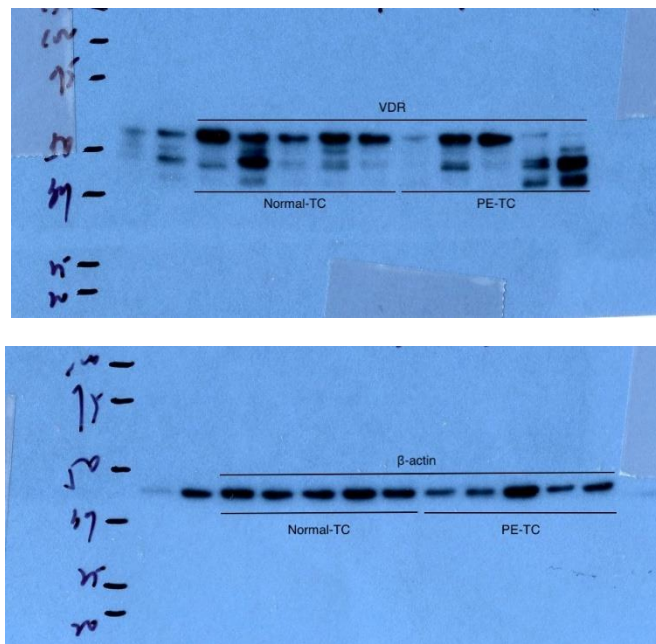

Figure 1C

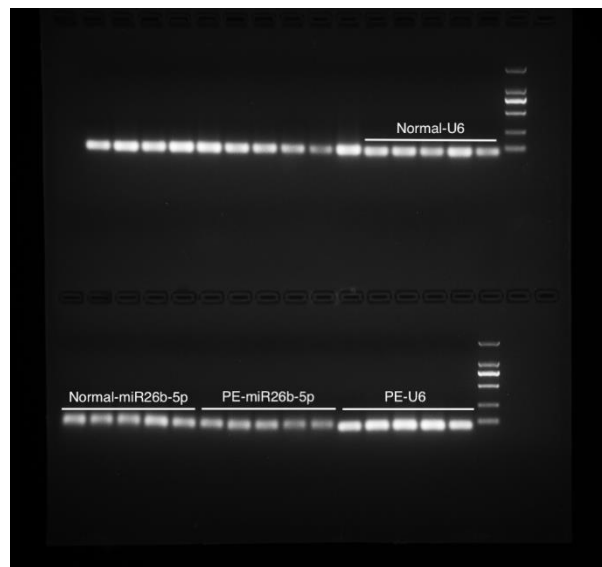

Figure 2A

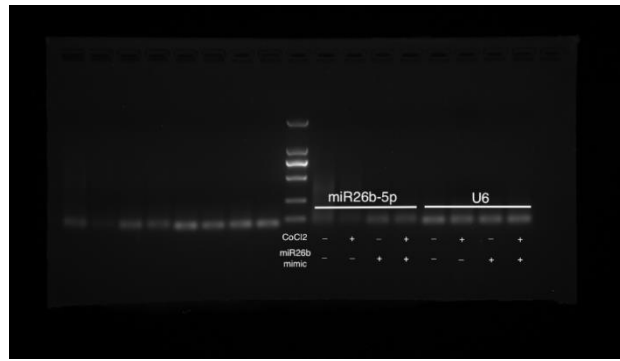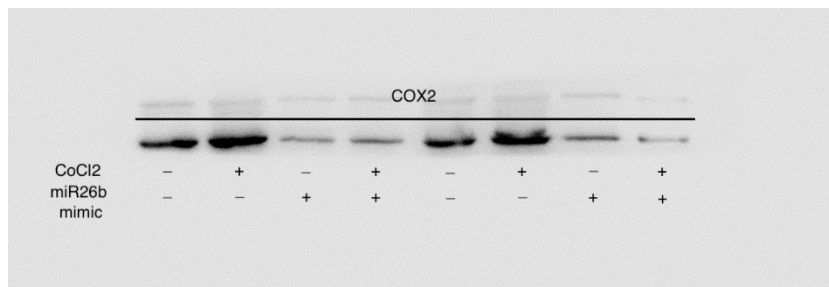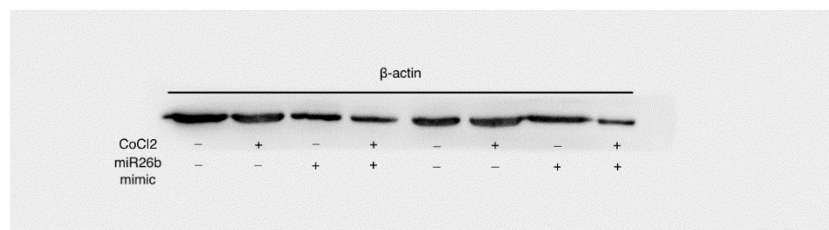

Figure 3A

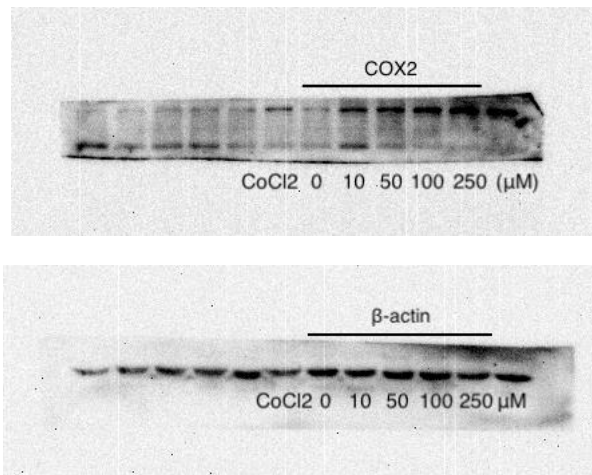

Figure 3B

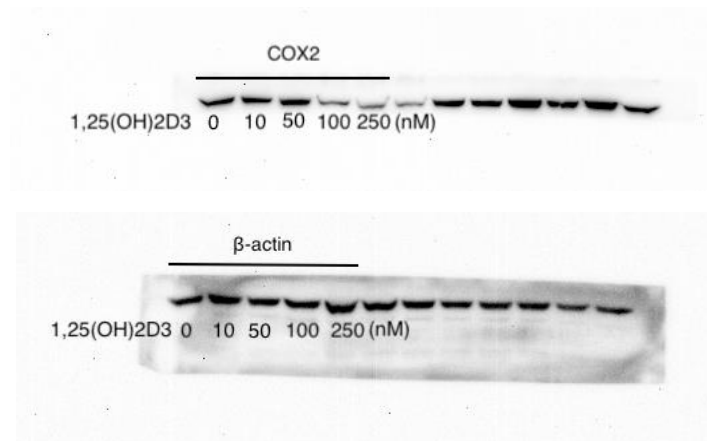

Figure 4B

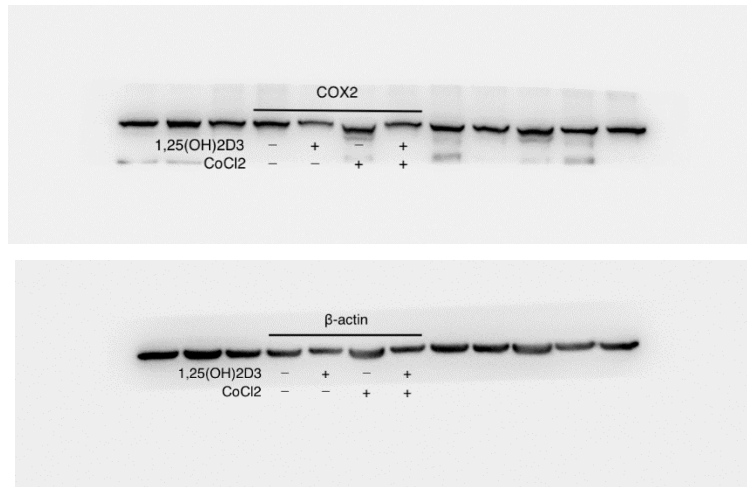

Figure 5A

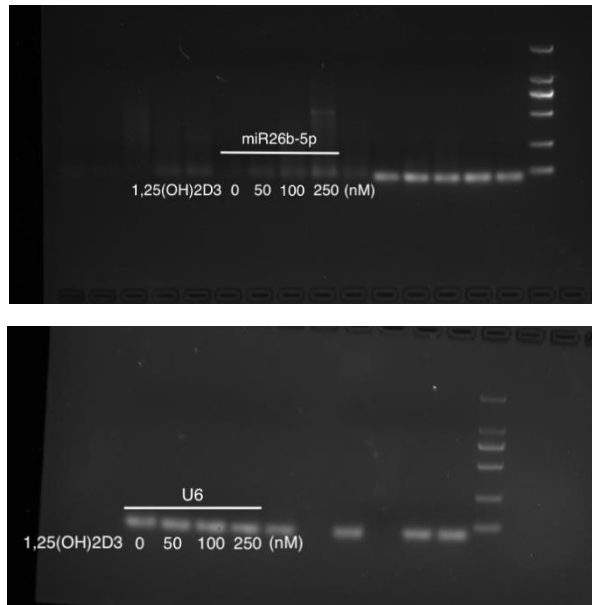

Figure 5B

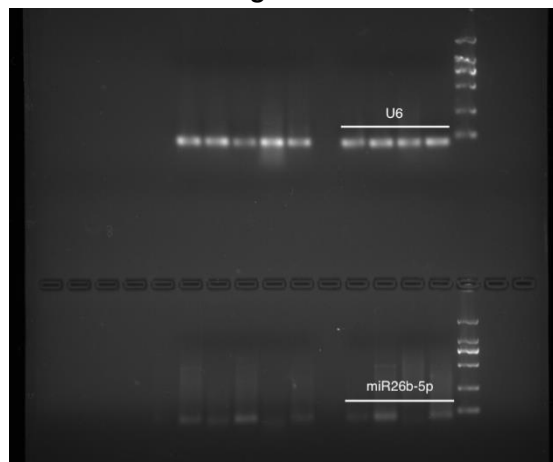

Figure 5C

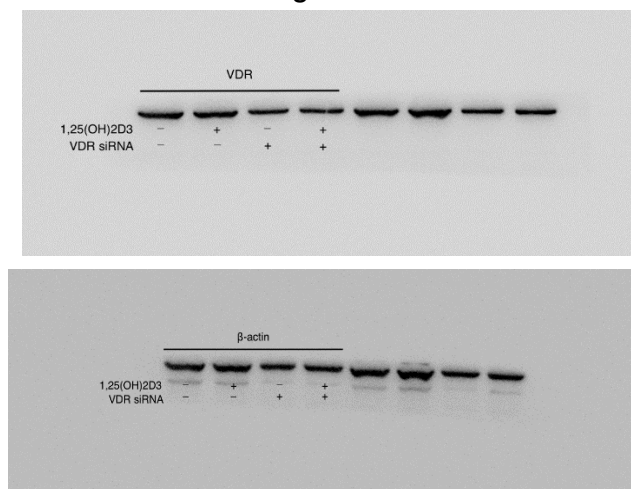

Figure 6A

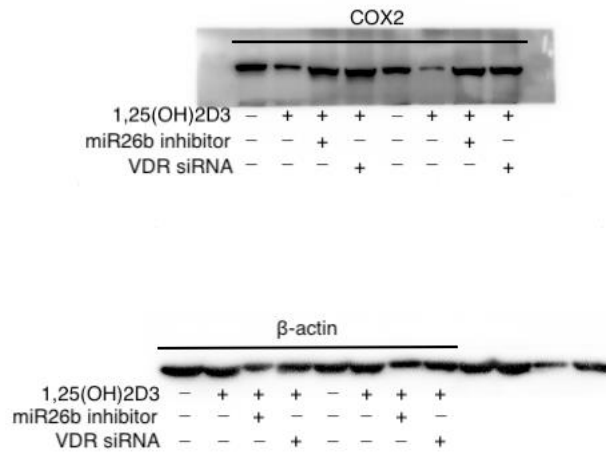

Figure 6B

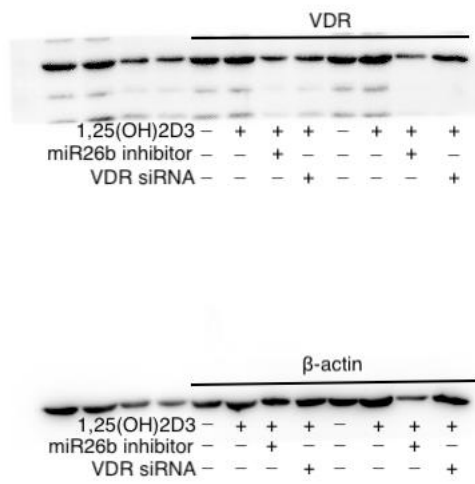

Supplement: 41598_2021_90605_MOESM2_ESM.pdf [file 41598_2021_90605_MOESM2_ESM.pdf]
